# Supplementary material
Source: PubMed Central journal article supplement (PMC5694347)
Supplement: NIHMS747686-supplement-Tables.pdf [file NIHMS747686-supplement-Tables.pdf]

## ONLINE-ONLY APPENDIX

**Table A1.** Prior therapies received (agents received by >5 patients).

| Prior therapy           | Schedule A, N=27 |          | Schedule B, N=17 |          | Total<br>N=44 |
|-------------------------|------------------|----------|------------------|----------|---------------|
|                         | MM               | Lymphoma | MM               | Lymphoma |               |
|                         | n=15             | n=12     | n=2              | n=15     |               |
| Prior agents, n (%)     |                  |          |                  |          |               |
| Doxorubicin             | 11 (73)          | 12 (100) | 1 (50)           | 14 (93)  | 38 (86)       |
| Cyclophosphamide        | 12 (80)          | 11 (92)  | 1 (50)           | 10 (67)  | 34 (77)       |
| Vincristine             | 11 (73)          | 11 (92)  | 1 (50)           | 11 (73)  | 34 (77)       |
| Prednisone <sup>a</sup> | 4 (27)           | 10 (83)  | 1 (50)           | 10 (67)  | 25 (57)       |
| Etoposide               | 2 (13)           | 10 (83)  | 0                | 12 (80)  | 24 (55)       |
| Rituximab               | 1 (7)            | 11 (92)  | 0                | 9 (60)   | 21 (48)       |
| Dexamethasone           | 14 (93)          | 3 (25)   | 2 (100)          | 2 (13)   | 21 (48)       |
| Ifosfamide              | 0                | 7 (58)   | 0                | 12 (80)  | 19 (43)       |
| Bortezomib              | 15 (100)         | 1 (8)    | 2 (100)          | 1 (7)    | 19 (43)       |
| Carboplatin             | 0                | 6 (50)   | 0                | 12 (80)  | 18 (41)       |
| Lenalidomide            | 11 (73)          | 0        | 2 (100)          | 1 (7)    | 14 (32)       |
| Melphalan               | 8 (53)           | 2 (17)   | 1 (50)           | 2 (13)   | 13 (30)       |
| Gemcitabine             | 0                | 5 (42)   | 0                | 6 (40)   | 11 (25)       |
| Thalidomide             | 11 (73)          | 0        | 0                | 0        | 11 (25)       |
| Vinorelbine             | 0                | 5 (42)   | 0                | 6 (40)   | 11 (25)       |
| Cytarabine              | 1 (7)            | 4 (33)   | 0                | 3 (20)   | 8 (18)        |
| Cisplatin               | 3 (20)           | 3 (25)   | 0                | 1 (7)    | 7 (16)        |
| Bleomycin               | 0                | 2 (17)   | 0                | 4 (27)   | 6 (14)        |
| Fludarabine             | 0                | 4 (33)   | 0                | 2 (13)   | 6 (14)        |

<sup>a</sup>Including prednisolone

**Table A2.** Summary of pevonedistat plasma pharmacokinetic parameters on days 1 and 9 of cycle 1 on schedule A (administration on days 1, 2, 8, 9 of 21-day cycles).

| Parameter                        | Pevonedistat dose, mg/m <sup>2</sup> |                  |                  |                   |                        |                  |
|----------------------------------|--------------------------------------|------------------|------------------|-------------------|------------------------|------------------|
|                                  | 25                                   | 50               | 65               | 83                | 110 (MTD)              | 147              |
| <b>Day 1, n</b>                  | <b>3</b>                             | <b>2</b>         | <b>3</b>         | <b>2</b>          | <b>13</b>              | <b>3</b>         |
| C <sub>max</sub> , ng/mL         | 272 (25)                             | 637              | 919 (25)         | 1285              | 1502 (33)              | 2380 (41)        |
| T <sub>max</sub> , hr            | 1.1<br>(1.0–1.5)                     | 2.0<br>(1.0–3.0) | 1.0<br>(1.0–1.0) | 1.2<br>(1.1–1.4)  | 1.0<br>(1.0–1.3)       | 1.0<br>(1.0–1.1) |
| AUC <sub>0–24hr</sub> , ng.hr/mL | 1367 <sup>a</sup>                    | 3329             | 3562 (21)        | 4526              | 4685 (23)              | 7704 (36)        |
| <b>Day 9, n</b>                  | <b>3</b>                             | <b>2</b>         | <b>2</b>         | <b>2</b>          | <b>9</b>               | <b>2</b>         |
| C <sub>max</sub> , ng/mL         | 281 (24)                             | 794              | 867              | 2495              | 1683 (28)              | 1734             |
| T <sub>max</sub> , hr            | 1.1<br>(1.1–1.5)                     | 1.0<br>(1.0–1.0) | 1.2<br>(1.2–1.2) | 1.4<br>(1.0–2.0)  | 1.1<br>(1.0–1.1)       | 1.0<br>(1.0–1.1) |
| AUC <sub>0–24hr</sub> , ng.hr/mL | 1631 (12)                            | 3084             | 3013             | 9860 <sup>b</sup> | 4833 (19) <sup>c</sup> | 4774             |

Data shown as geometric mean (%coefficient of variation) except for T<sub>max</sub>, which is shown as median (range). <sup>a</sup>n=2, <sup>b</sup>n=1, <sup>c</sup>n=7

**Table A3.** Summary of pevonedistat plasma pharmacokinetic parameters on days 1 and 4 (or, alternatively, day 11) of cycle 1 on schedule B (administration on days 1, 4, 8, 11 of 21-day cycles).

| Parameter                        | Pevonedistat dose, mg/m <sup>2</sup> |                    |                    |                          |                    |                     |
|----------------------------------|--------------------------------------|--------------------|--------------------|--------------------------|--------------------|---------------------|
|                                  | 100                                  | 110                | 147                | 196 (MTD)                | 261                |                     |
| <b>Day 1, n</b>                  | <b>1</b>                             | <b>2</b>           | <b>2</b>           | <b>7</b>                 | <b>4</b>           |                     |
| C <sub>max</sub> , ng/mL         | 1790                                 | 1977               | 2253               | 4565 (24)                | 4255 (32)          |                     |
| T <sub>max</sub> , hr            | 1.0                                  | 1.1                | 1.0                | 1.1                      | 1.0                |                     |
|                                  |                                      | (1.0–1.1)          | (1.0–1.0)          | (1.0–1.1)                | (1.0–1.3)          |                     |
| AUC <sub>0–24hr</sub> , ng.hr/mL | 5070                                 | 5657               | 5858               | 10,830 (19) <sup>a</sup> | 10,232 (13)        |                     |
| <b>Day 4 or Day 11, n</b>        | <b>Day 4, n=1</b>                    | <b>Day 11, n=2</b> | <b>Day 11, n=2</b> | <b>Day 4, n=6</b>        | <b>Day 11, n=2</b> | <b>Day 11, n=3</b>  |
| C <sub>max</sub> , ng/mL         | 1790                                 | 1479               | 2141               | 3751 (53)                | 3010               | 5289 (7)            |
| T <sub>max</sub> , hr            | 1.0                                  | 1.3                | 1.1                | 1.0                      | 1.0                | 1.0                 |
|                                  |                                      | (1.0–1.5)          | (1.1–1.2)          | (0.9–1.1)                | (1.0–1.1)          | (1.0–1.0)           |
| AUC <sub>0–24hr</sub> , ng.hr/mL | 5090                                 | 4561               | 6382               | 8309 (39)                | 6950 <sup>b</sup>  | 10,600 <sup>c</sup> |

Data shown as geometric mean (%coefficient of variation) except for T<sub>max</sub>, which is shown as median (range). <sup>a</sup>n=6, <sup>b</sup>n=1, <sup>c</sup>n=2.

**Table A4.** Changes from baseline in gene expression levels for NAE-regulated transcriptional targets on cycle 1, day 1 following pevonedistat administration at the MTDs on schedules A and B

| <b>Parameter, median<br/>(range)</b> | <b>Schedule A, MTD,<br/>110 mg/m<sup>2</sup>, n=12</b> | <b>Schedule B, MTD,<br/>196 mg/m<sup>2</sup>, n=6</b> |
|--------------------------------------|--------------------------------------------------------|-------------------------------------------------------|
| <b><i>ATF3</i></b>                   |                                                        |                                                       |
| E <sub>max</sub> , %                 | 182 (-16.6–3190)                                       | 454 (26.9–922)                                        |
| TE <sub>max</sub> , hr               | 9.0 (5.3–24.5)                                         | 8.3 (4.9–9.0)                                         |
| <b><i>GCLM</i></b>                   |                                                        |                                                       |
| E <sub>max</sub> , %                 | 47.0 (-6.5–215)                                        | 117 (61.4–255)                                        |
| TE <sub>max</sub> , hr               | 7.0 (0–20.9)                                           | 5.7 (4.9–8.9)                                         |
| <b><i>GSR</i></b>                    |                                                        |                                                       |
| E <sub>max</sub> , %                 | 158 (33.1–829)                                         | 209 (152–341)                                         |
| TE <sub>max</sub> , hr               | 8.0 (0–9.0)                                            | 8.4 (6.3–9.0)                                         |
| <b><i>MAG1</i></b>                   |                                                        |                                                       |
| E <sub>max</sub> , %                 | 85.3 (-19.5–870)                                       | 145 (64.6–469)                                        |
| TE <sub>max</sub> , hr               | 8.3 (0–20.9)                                           | 7.6 (4.9–29.0)                                        |
| <b><i>NQO1</i></b>                   |                                                        |                                                       |
| E <sub>max</sub> , %                 | 494 (121–3580)                                         | 655 (564–1090)                                        |
| TE <sub>max</sub> , hr               | 8.3 (5.0–9.0)                                          | 6.5 (5.0–9.0)                                         |
| <b><i>SLC7A11</i></b>                |                                                        |                                                       |
| E <sub>max</sub> , %                 | 1295 (7.6–10,700)                                      | 1507 (414–10,900)                                     |
| TE <sub>max</sub> , hr               | 5.3 (5.0–9.1)                                          | 7.0 (5.0–9.0)                                         |
| <b><i>SRXN1</i></b>                  |                                                        |                                                       |
| E <sub>max</sub> , %                 | 103.9 (-3.2–211)                                       | 126 (44.5–390)                                        |

|                        |                  |               |
|------------------------|------------------|---------------|
| TE <sub>max</sub> , hr | 7.8 (0–23.2)     | 7.0 (5.0–8.9) |
| <b><i>TXNRD1</i></b>   |                  |               |
| E <sub>max</sub> , %   | 159.5 (37.8–482) | 304 (229–364) |
| TE <sub>max</sub> , hr | 5.1 (5.0–9.0)    | 5.0 (4.9–9.0) |

E<sub>max</sub>, observed maximum effect compared to baseline; hr, hours; TE<sub>max</sub>, time

to E<sub>max</sub>.

**Table A5.** Patients achieving partial responses

| <b>Schedule</b> | <b>Pevonedistat dose</b> | <b>Patient characteristics and disease history</b>                                                                                                                                   | <b>Prior therapy</b>                                                                                                                                                                                                                | <b>Response kinetics</b>                                                                                |
|-----------------|--------------------------|--------------------------------------------------------------------------------------------------------------------------------------------------------------------------------------|-------------------------------------------------------------------------------------------------------------------------------------------------------------------------------------------------------------------------------------|---------------------------------------------------------------------------------------------------------|
| A               | 110 mg/m <sup>2</sup>    | 34-year-old male with relapsed nodular sclerosis HL; diagnosed 31 months before study entry; presented with B symptoms of recurrent drenching night sweats during the previous month | 4 lines of prior therapy with: doxorubicin, bleomycin, vinblastine, dacarbazine; ifosfamide, carboplatin, etoposide; carmustine, etoposide, cytarabine, melphalan; and a monoclonal antibody (XmAb2513), with a best response of CR | Steady decrease in tumor burden; achieved PR after 5 cycles; had progressive disease on cycle 7, day 21 |
| B               | 196 mg/m <sup>2</sup>    | 47-year-old male with DLBCL; Ann Arbor stage IV with bone marrow involvement, diagnosed 59 months                                                                                    | 3 lines of prior therapy: Rituximab, cyclophosphamide, doxorubicin, vincristine,                                                                                                                                                    | PR after 3 cycles; remained on study to cycle 9, day 18, when                                           |

|   |                       |                                                                                                                      |                                                                                                                                      |                                                                                  |
|---|-----------------------|----------------------------------------------------------------------------------------------------------------------|--------------------------------------------------------------------------------------------------------------------------------------|----------------------------------------------------------------------------------|
|   |                       | before study entry                                                                                                   | prednisone; rituximab, fludarabine, busulphan; tositumomab; with a best response of PR                                               | experienced disease progression                                                  |
| B | 196 mg/m <sup>2</sup> | 65-year-old female with peripheral T-cell lymphoma (not otherwise specified); diagnosed 60 months before study entry | 4 lines of prior therapy: Doxorubicin, vincristine, prednisone; cyclophosphamide; belinostat; vorinostat; with a best response of CR | Achieved a PR in cycle 1 (day 21) that lasted 2 cycles until disease progression |

**Table A6.** Patients achieving stable disease and receiving at least 5 cycles of pevonedistat

| <b>Schedule</b> | <b>Pevonedistat dose</b> | <b>Disease type</b> | <b>Treatment cycles</b> | <b>Duration of SD</b> | <b>Prior therapies</b>                                                                                                                                                                                                    | <b>Prior transplant</b> |
|-----------------|--------------------------|---------------------|-------------------------|-----------------------|---------------------------------------------------------------------------------------------------------------------------------------------------------------------------------------------------------------------------|-------------------------|
| A               | 25 mg/m <sup>2</sup>     | MM                  | 5                       | 3.22                  | MAbs, bortezomib, lenalidomide, thalidomide                                                                                                                                                                               | –                       |
|                 | 25 mg/m <sup>2</sup>     | MM                  | 8                       | 5.55                  | MAbs, cyclophosphamide, dexamethasone (x4), doxorubicin, lenalidomide, thalidomide, bortezomib, vincristine                                                                                                               | Autologous              |
|                 | 110 mg/m <sup>2</sup>    | Lymphoma            | 5                       | 3.29                  | Tositumomab, bleomycin, cyclophosphamide (x2), prednisone (x3), doxorubicin, etoposide, fludarabine, cytarabine, chlormethine, mitoxantrone, platinum, procarbazine, rituximab (x3), methylprednisolone, vincristine (x3) | –                       |
|                 | 110 mg/m <sup>2</sup>    | MM                  | 5                       | 3.94                  | Bortezomib, cyclophosphamide, dexamethasone (x4), lenalidomide, thalidomide                                                                                                                                               | –                       |

| Schedule | Pevonedistat dose     | Disease type | Treatment cycles | Duration of SD | Prior therapies                                                                                                                                                      | Prior transplant |
|----------|-----------------------|--------------|------------------|----------------|----------------------------------------------------------------------------------------------------------------------------------------------------------------------|------------------|
|          | 110 mg/m <sup>2</sup> | MM           | 5                | 3.45           | (x2)<br>Doxorubicin, cyclophosphamide, dexamethasone (x2), melphalan, bortezomib, vincristine                                                                        | Autologous       |
|          | 110 mg/m <sup>2</sup> | MM           | 9                | 6.01           | Carfilzomib, cisplatin, cyclophosphamide, dexamethasone (x4), doxorubicin (x3), etoposide, prednisone, lenalidomide, thalidomide (x3), bortezomib (x2), vincristine  | Autologous       |
| B        | 147 mg/m <sup>2</sup> | Lymphoma     | 5                | 3.25           | Carboplatin, cyclophosphamide (x3), doxorubicin (x2), etoposide, gemcitabine, dexamethasone, vincristine (x2), ifosfamide, vinorelbine, prednisolone, rituximab (x2) | Autologous       |

| <b>Schedule</b> | <b>Pevonedistat dose</b> | <b>Disease type</b> | <b>Treatment cycles</b> | <b>Duration of SD</b> | <b>Prior therapies</b>                                                                                                                                                                   | <b>Prior transplant</b> |
|-----------------|--------------------------|---------------------|-------------------------|-----------------------|------------------------------------------------------------------------------------------------------------------------------------------------------------------------------------------|-------------------------|
|                 | 196 mg/m <sup>2</sup>    | Lymphoma            | 5                       | 3.25                  | Doxorubicin, carboplatin, cyclophosphamide, cytarabine, dexamethasone, etoposide, gemcitabine (x2), ifosfamide, vinorelbine (x2), rituximab (x4), vincristine, ibritumomab tiuxetan (x2) | –                       |
|                 | 196 mg/m <sup>2</sup>    | Lymphoma            | 7                       | 5.32                  | Bleomycin, carboplatin, dacarbazine, doxorubicin (x2), etoposide, gemcitabine, ifosamide, vinorelbine, vinblastine                                                                       | Autologous              |
|                 | 196 mg/m <sup>2</sup>    | Lymphoma            | 13                      | 9.26                  | Bendamustine, bleomycin, carboplatin, investigational drug (x2), doxorubicin (x2), etoposide (x3), gemcitabine (x2), ifosfamide, vinorelbine (x2), chlormethine, prednisone,             | Allogeneic / Autologous |

| Schedule | Pevonedistat dose     | Disease type | Treatment cycles | Duration of SD | Prior therapies                                                                                                                                                                                                                                                                                 | Prior transplant |
|----------|-----------------------|--------------|------------------|----------------|-------------------------------------------------------------------------------------------------------------------------------------------------------------------------------------------------------------------------------------------------------------------------------------------------|------------------|
|          | 196 mg/m <sup>2</sup> | Lymphoma     | 14               | 9.53           | procarbazine, vinblastine, vincristine (x2)<br>Bendamustine, bortezomib, carboplatin, carmustine, cyclophosphamide (x2), cytarabine, doxorubicin, etoposide (x2), fludarabine, ifosfamide, melphalan, nicotinamide, prednisolone, rituximab (x4), vincristine, vorinostat, ibritumomab tiuxetan | Autologous       |
|          | 261 mg/m <sup>2</sup> | Lymphoma     | 11               | 7.52           | Carboplatin, cyclophosphamide, doxorubicin, etoposide, ifosfamide, inotuzumab, prednisolone, rituximab (x3), vincristine                                                                                                                                                                        | –                |

### **Figure Legend**

**Figure A1.** Representative images (20 x magnification) of formalin-fixed paraffin-embedded clots prepared from bone marrow aspirates. Samples were collected at screening or post dose (patient treated at 110 mg/m<sup>2</sup>) on cycle 1, day 2, and stained on serial sections with either anti-CD138 (panels A and C) or anti-pevonedistat–NEDD8 adduct (panels B and D) on serial sections. The arrows indicate examples of areas containing cells that are positive for both antigens. Scale bar represents 500 μm.
