# Supplementary material
Source: PubMed Central journal article supplement (PMC5694347)

Supplementary Figure 1

Screening

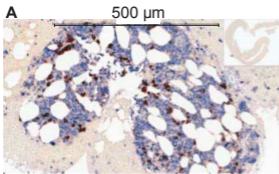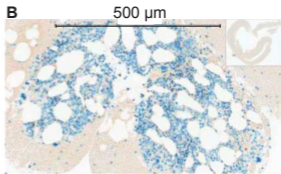

Cycle 1, Day 2

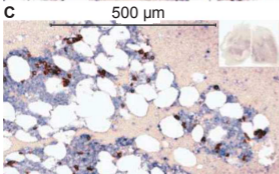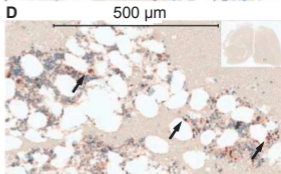

Supplement: NIHMS747686-supplement-Figure.pdf [file NIHMS747686-supplement-Figure.pdf]
